# Supplementary material
Source: publisher figshare collection journal article supplement (https://acs.figshare.com/ndownloader/files/3812761)
Supplement: Supplementary file 1 [file 3812761]

## Supporting Information

### **Structural Characterization and Anticancer Activity of Cell-bound Exopolysaccharide (c-EPS) from *Lactobacillus helveticus* MB2-1**

**Wei Li,<sup>†</sup> Xiudong Xia,<sup>‡</sup> Weizhi Tang,<sup>†</sup> Juan Ji,<sup>†</sup> Xin Rui,<sup>†</sup> Xiaohong Chen,<sup>†</sup> Mei Jiang,<sup>†</sup> Jianzhong  
Zhou,<sup>‡</sup> Qiuqin Zhang,<sup>†</sup> and Mingsheng Dong,<sup>†\*</sup>**

<sup>†</sup>College of Food Science and Technology, Nanjing Agricultural University, Nanjing, Jiangsu 210095,  
P.R. China.

<sup>‡</sup>Institute of Agro-Product Processing, Jiangsu Academy of Agricultural Sciences, Nanjing, Jiangsu  
210095, P.R. China.

---

\* To whom correspondence should be addressed. Tel: +86 25 84396989, Fax: +86 25  
84399090; Email: [dongms@njau.edu.cn](mailto:dongms@njau.edu.cn).

### Figure Captions

**Figure S1.**  $^1\text{H}$ - $^{13}\text{C}$  heteronuclear single quantum coherence spectroscopy (HSQC) of c-EPS from *L. helveticus* MB2-1 recorded on Bruker Avance DRX-500 spectrometer in  $\text{D}_2\text{O}$  (**a**). The assignments of sugar residues in non-anomeric region for HSQC spectrum (**b**).

**Figure S2.** 2D  $^1\text{H}$ - $^1\text{H}$  correlated spectroscopy (COSY) of c-EPS from *L. helveticus* MB2-1 recorded on Bruker Avance DRX-500 spectrometer in  $\text{D}_2\text{O}$  (**a**). The assignments of sugar residues in non-anomeric region for COSY spectrum (**b**).

**Figure S3.** Nuclear Overhauser effect spectroscopy (NOESY) of c-EPS from *L. helveticus* MB2-1 recorded on Bruker Avance DRX-500 spectrometer.

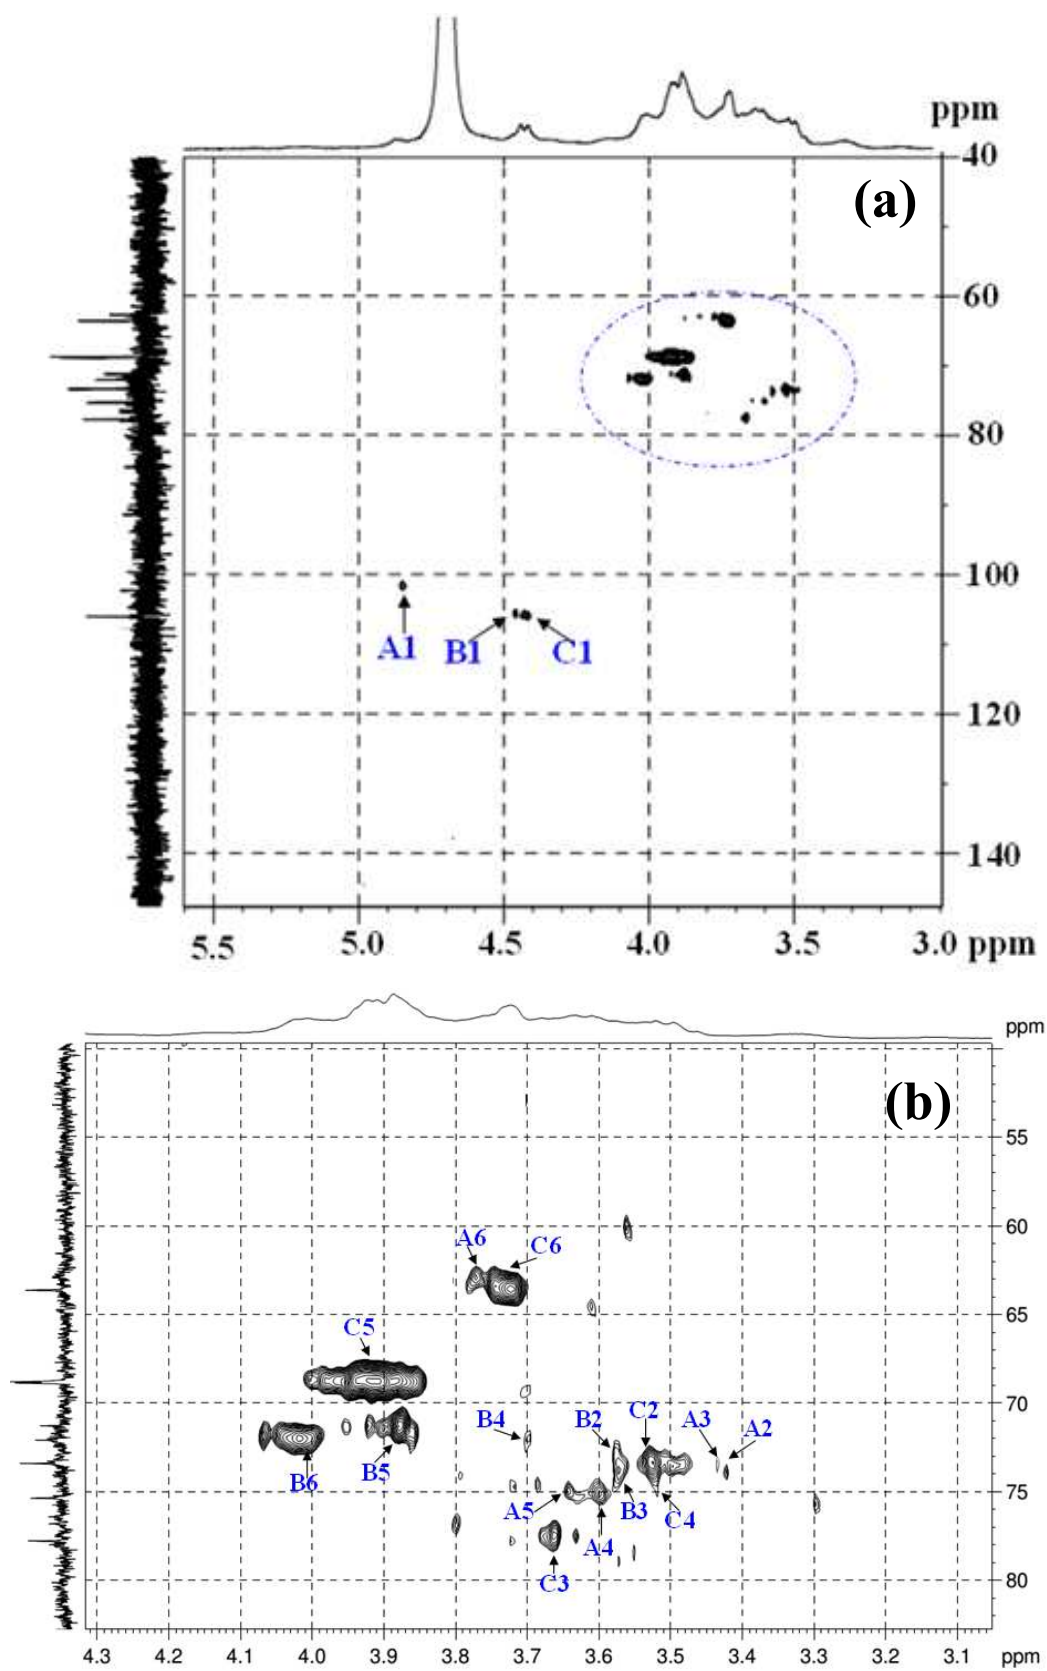

Figure S1

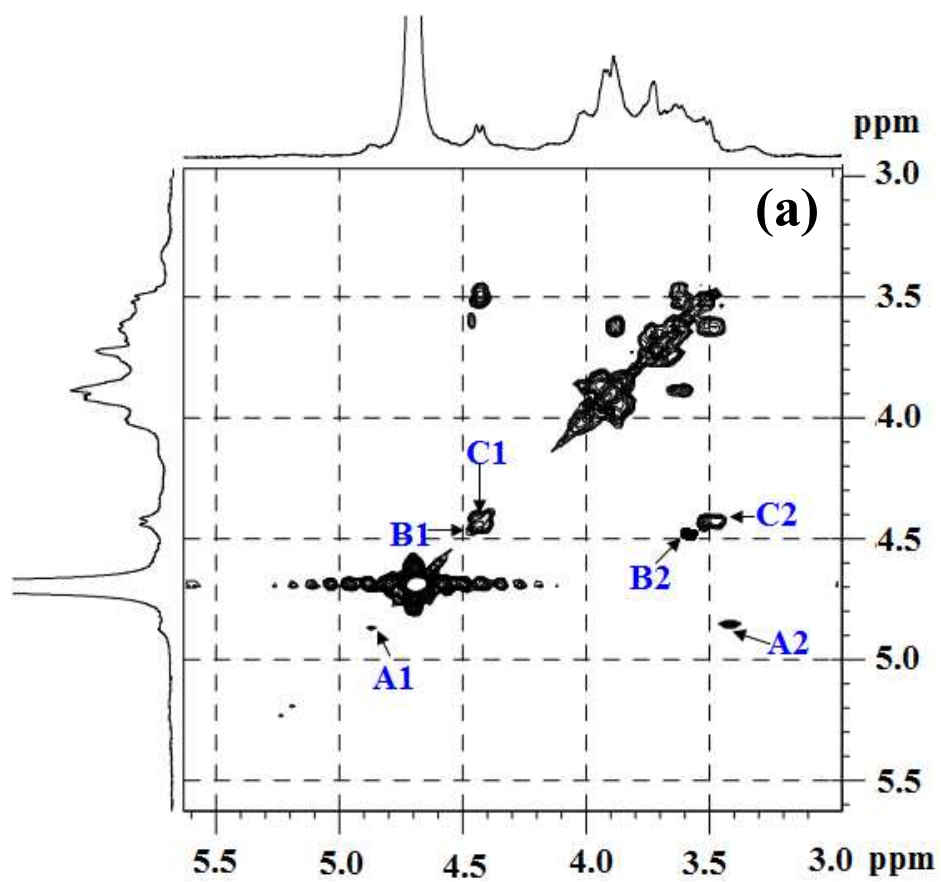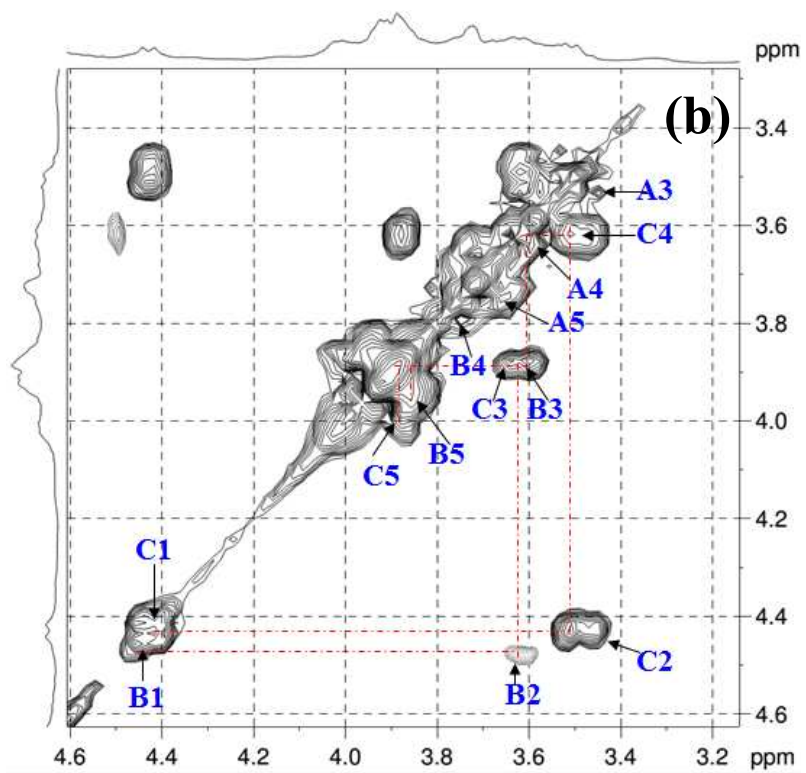

Figure S2

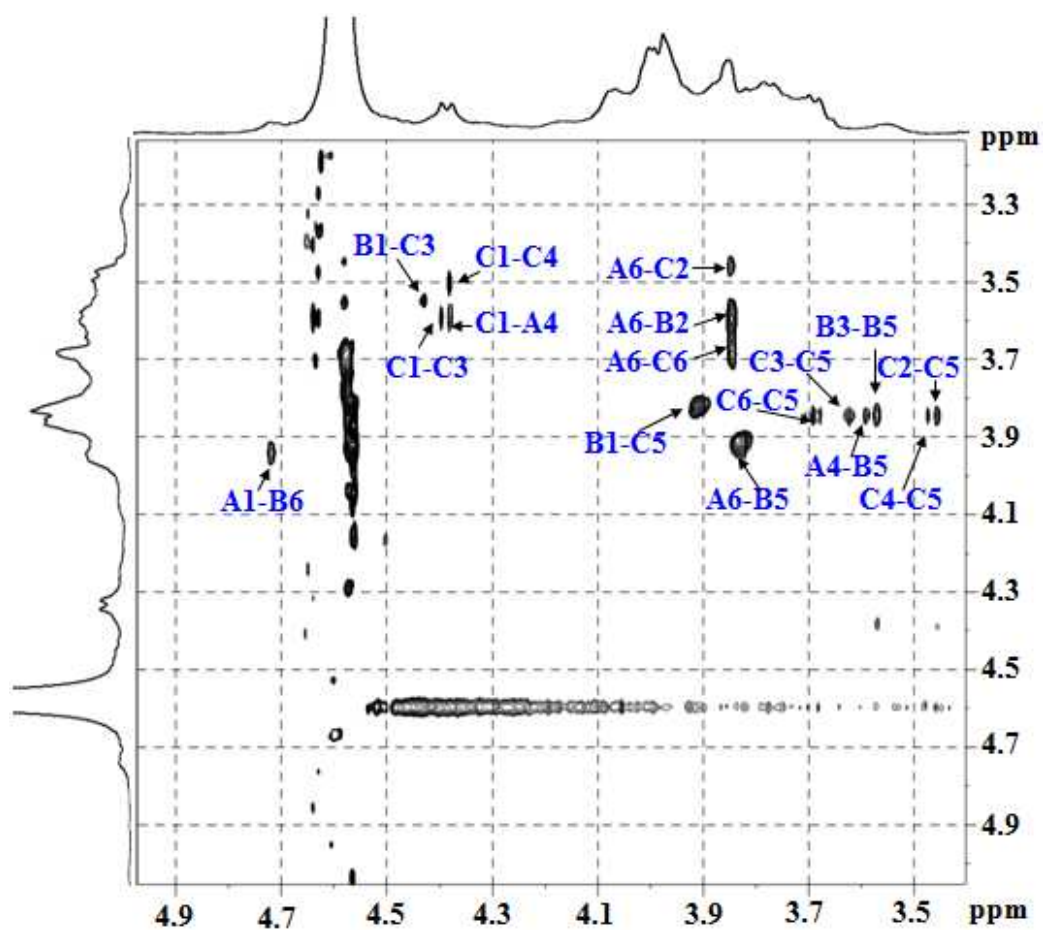

Figure S3
